# Supplementary material for: On the cross-population generalizability of gene expression prediction models
Source: PLoS Genet. 2020 Aug 14;16(8):e1008927. doi: 10.1371/journal.pgen.1008927 (PMC7449671; doi:10.1371/journal.pgen.1008927)
Supplement: S10 Table — (XLSX) [file pgen.1008927.s010.xlsx]

## Sheet: Hoja1
Train-Test	YRI proportion	Power	95% CI	Train-Test	YRI proportion	Power	95% CI
AD to CEU	0	0.11	0.048 - 0.172	CEU to YRI	0	0.07	0.020 - 0.120
AD to CEU	0.1	0.12	0.056 - 0.184	CEU to YRI	0.1	0.06	0.013 - 0.107
AD to CEU	0.2	0.13	0.064 - 0.196	CEU to YRI	0.2	0.07	0.020 - 0.120
AD to CEU	0.3	0.1	0.041 - 0.159	CEU to YRI	0.3	0.07	0.020 - 0.120
AD to CEU	0.4	0.14	0.072 - 0.208	CEU to YRI	0.4	0.08	0.027 - 0.133
AD to CEU	0.5	0.14	0.072 - 0.208	CEU to YRI	0.5	0.07	0.020 - 0.120
AD to CEU	0.6	0.1	0.041 - 0.159	CEU to YRI	0.6	0.07	0.020 - 0.120
AD to CEU	0.7	0.16	0.088 - 0.232	CEU to YRI	0.7	0.07	0.020 - 0.120
AD to CEU	0.8	0.1	0.041 - 0.159	CEU to YRI	0.8	0.07	0.020 - 0.120
AD to CEU	0.9	0.11	0.048 - 0.172	CEU to YRI	0.9	0.07	0.020 - 0.120
AD to CEU	1	0.13	0.064 - 0.196	CEU to YRI	1	0.07	0.020 - 0.120
AD to YRI	0	0.07	0.020 - 0.120	YRI to AD	0	0.22	0.138 - 0.302
AD to YRI	0.1	0.07	0.020 - 0.120	YRI to AD	0.1	0.22	0.138 - 0.302
AD to YRI	0.2	0.07	0.020 - 0.120	YRI to AD	0.2	0.25	0.165 - 0.335
AD to YRI	0.3	0.1	0.041 - 0.159	YRI to AD	0.3	0.23	0.147 - 0.313
AD to YRI	0.4	0.08	0.027 - 0.133	YRI to AD	0.4	0.2	0.121 - 0.279
AD to YRI	0.5	0.11	0.048 - 0.172	YRI to AD	0.5	0.27	0.183 - 0.357
AD to YRI	0.6	0.08	0.027 - 0.133	YRI to AD	0.6	0.2	0.121 - 0.279
AD to YRI	0.7	0.07	0.020 - 0.120	YRI to AD	0.7	0.19	0.113 - 0.267
AD to YRI	0.8	0.09	0.034 - 0.146	YRI to AD	0.8	0.28	0.192 - 0.368
AD to YRI	0.9	0.09	0.034 - 0.146	YRI to AD	0.9	0.22	0.138 - 0.302
AD to YRI	1	0.09	0.034 - 0.146	YRI to AD	1	0.19	0.113 - 0.267
CEU to AD	0	0.18	0.104 - 0.256	YRI to CEU	0	0.08	0.027 - 0.133
CEU to AD	0.1	0.23	0.147 - 0.313	YRI to CEU	0.1	0.07	0.020 - 0.120
CEU to AD	0.2	0.2	0.121 - 0.279	YRI to CEU	0.2	0.07	0.020 - 0.120
CEU to AD	0.3	0.23	0.147 - 0.313	YRI to CEU	0.3	0.07	0.020 - 0.120
CEU to AD	0.4	0.18	0.104 - 0.256	YRI to CEU	0.4	0.08	0.027 - 0.133
CEU to AD	0.5	0.23	0.147 - 0.313	YRI to CEU	0.5	0.07	0.020 - 0.120
CEU to AD	0.6	0.2	0.121 - 0.279	YRI to CEU	0.6	0.07	0.020 - 0.120
CEU to AD	0.7	0.19	0.113 - 0.267	YRI to CEU	0.7	0.07	0.020 - 0.120
CEU to AD	0.8	0.21	0.130 - 0.290	YRI to CEU	0.8	0.07	0.020 - 0.120
CEU to AD	0.9	0.21	0.130 - 0.290	YRI to CEU	0.9	0.07	0.020 - 0.120
CEU to AD	1	0.19	0.113 - 0.267	YRI to CEU	1	0.1	0.041 - 0.159
